# Supplementary material for: Structural, magnetic, and electrochemical properties of hierarchical microspindle-like Fe2−xMnxO3 composites from thermal decomposition of oxalates
Source: Springer Nature journal article supplement (doi:10.1007/s10854-020-02946-2), 2020-01-28
Supplement: MOESM1 [file 17643200]

**Supplementary information**

**Structural, magnetic and electrochemical properties of hierarchical microspindle-like Fe2-xMnxO3 composites from thermal decomposition of oxalates**

Xiaohui Guo[[1]](#footnote-1), Xinyu Liang, Xingyu Zhou, Senyao Hu, Wenxiu He, Guibao Guo

Corresponding author. Tel.: +86-472-5951561; Fax: +86-472-5951561.

E-mail address: gxhsxicc@163.com

School of Chemistry and Chemical Engineering, Inner Mongolia University of Science & Technology, Baotou 014010, Inner Mongolia, China

**Experimental**

The element distribution of Mn and Fe in precursor was taken using a field emission electron microscope (200 kV, JEM-2100F, JEOL) equipped with STEM high angle annular dark field (STEM-HAADF) detector.

Fig.S1. HAADF-STEM element mapping for precursor

1. 🖂Xiaohui Guo. gxhsxicc@163.com [↑](#footnote-ref-1)
